# Supplementary material for: Network analysis of depression and anxiety symptoms in Chinese rheumatoid arthritis patients
Source: PeerJ. 2023 Nov 6;11:e16356. doi: 10.7717/peerj.16356 (PMC10634336; doi:10.7717/peerj.16356)
Supplement: Supplemental Information 1 [file peerj-11-16356-s001.xls]

## Sheet: 402
A1	D1	A2	D2	A3	D3	A4	D4	A5	D5	A6	D6	A7	D7	QoL	Gender	BMI	Age	Marital status (1:Single; 2:Married; 3:Others)	Education (1:Primary and below; 1:Secondary; 2:Graduate and above)	Employment (0:Unemployed; 1:Employed)	Health insurance (0:No;1:Yes)	Income/family/year (1:≤ 13000 yuan; 2:13000- 33000 yuan;3:≥ 33000 yuan)	Comorbid condition (0:No;1:Yes)	Disease Duration	Family history (0:No;1:Yes)	Hospitalization history (0:No;1:Yes)	Tobacco usage (0:No;1:Yes)	Alcohol usage (0:No;1:Yes)
1	1	2	1	1	1	2	1	1	1	2	1	2	1	124.25	2	28.3447	49	2	2	1	1	1	0	3	0	1	0	0
0	0	1	0	0	0	1	3	1	0	0	0	0	0	130.88	2	22.0317	55	1	2	0	1	1	0	8	0	1	0	0
0	0	1	0	1	1	0	1	3	0	1	0	0	2	138.92	2	26.0146	68	2	1	0	0	1	1	2	0	1	0	0
1	0	1	0	0	0	1	0	1	0	1	0	0	0	170.38	1	19.6283	65	2	1	0	1	1	1	5	0	1	0	0
1	2	3	2	2	1	2	1	1	1	0	2	0	1	55	2	20.3244	53	2	1	1	1	1	0	10	0	1	0	0
2	1	2	0	1	0	1	0	2	0	1	0	0	3	80.75	2	21.4844	59	2	1	1	1	2	0	30	0	1	0	0
1	1	3	2	1	1	2	1	2	1	1	1	2	1	79.88	2	17.0656	46	2	2	1	1	1	0	0.5	0	1	0	0
1	1	1	0	0	0	0	0	0	3	3	0	0	0	84.25	1	27.6817	61	2	2	0	1	3	1	3	0	1	1	1
0	1	0	0	1	0	3	0	1	3	1	0	1	0	182.88	1	18.6214	80	3	1	1	1	2	0	2.5	0	1	0	0
1	0	1	2	0	1	2	3	2	2	2	2	1	3	105.25	2	25.7117	46	2	1	0	1	1	0	1	0	1	0	0
1	0	0	0	0	0	0	0	0	0	0	0	0	0	161.75	2	20.0288	57	2	1	1	1	2	0	15	0	1	0	0
0	0	0	0	0	0	0	2	0	0	0	0	1	0	176.63	2	26.0375	63	2	2	0	1	2	1	4	0	1	0	0
0	0	0	0	0	0	0	1	1	1	0	0	0	0	126.58	1	27.7743	50	2	3	1	1	3	0	6	0	1	0	1
0	0	2	0	0	0	1	0	0	0	0	0	0	3	157.67	2	22.4323	48	2	2	0	1	2	0	0.3	0	1	0	0
1	1	1	2	0	2	1	0	1	0	1	1	1	0	114	2	18.4911	41	2	3	1	1	2	0	2.5	0	1	0	1
1	0	0	0	0	0	1	3	0	0	0	0	0	0	132.5	2	21.4844	67	2	1	0	1	1	1	27	0	1	0	0
2	3	2	0	0	1	1	1	2	2	1	1	0	0	75	2	20.7031	60	2	1	0	0	1	0	5	0	1	0	0
2	0	0	0	2	2	1	2	1	0	2	2	1	2	97.13	1	22.0386	54	1	1	0	1	1	0	3	0	1	0	0
2	3	3	1	3	3	2	1	2	1	3	2	3	1	59.88	2	18.3655	39	2	3	1	1	2	0	2.5	0	1	0	0
1	1	1	0	1	0	1	2	3	0	0	1	0	1	72.5	2	24.6094	60	2	2	0	1	1	0	12	0	1	0	0
1	1	2	1	1	0	0	0	2	0	2	1	1	1	147.38	2	25.3906	50	2	2	0	1	2	1	4	0	1	0	0
1	1	1	2	0	1	2	0	3	0	0	1	1	0	71.88	2	21.4844	49	2	2	1	0	1	0	3	0	1	0	0
2	1	3	1	3	1	2	1	1	2	2	1	1	1	73.13	2	18.4911	58	2	2	0	1	1	1	8	0	1	0	0
2	3	3	2	1	2	1	3	1	2	2	1	1	1	34.38	1	23.1834	61	2	1	1	1	2	1	10	0	1	0	0
2	1	1	0	0	0	0	0	3	0	0	0	0	0	85.88	2	25.0995	74	2	1	0	0	1	1	2	1	1	0	0
2	1	3	1	2	2	2	0	1	1	1	1	0	1	78	2	24.3141	50	2	2	1	1	1	1	4	0	1	0	0
2	2	2	0	1	0	1	0	2	0	0	0	1	0	83.5	2	22.4813	68	2	1	0	0	1	0	1.5	0	1	0	0
1	0	1	0	1	0	1	0	0	0	0	1	1	0	177.38	2	19.2234	46	2	3	1	1	3	0	11	0	1	0	1
0	0	0	0	0	0	1	0	2	0	0	0	1	1	121.88	2	22.4766	68	2	1	0	1	1	0	0.5	0	1	0	0
0	2	1	2	0	1	2	0	1	2	1	1	1	1	107.25	2	21.4844	58	2	2	0	1	1	0	0.5	3	1	0	1
1	2	2	0	1	2	1	1	2	0	1	0	2	1	86.5	2	29.1363	68	2	1	0	1	1	1	0.5	0	1	0	0
2	3	2	2	2	3	2	0	0	3	3	3	1	3	31.88	2	27.0552	65	2	1	0	0	1	1	10	0	1	0	1
1	0	1	0	0	0	1	1	2	0	1	1	0	0	151.75	2	20.0288	67	2	1	0	0	1	0	0.5	0	1	0	0
1	0	1	0	0	2	0	2	0	0	1	0	0	0	70.5	2	25.8264	63	3	2	0	1	2	1	26	0	1	1	1
3	3	3	3	3	3	2	3	3	3	3	3	3	0	7.13	2	26.5625	45	2	2	0	1	1	1	24	0	1	0	0
1	2	1	0	0	1	2	0	1	1	1	1	0	1	153.25	2	22.5827	43	2	3	1	0	1	0	8	0	1	0	0
1	0	1	0	0	0	0	0	0	0	1	1	0	0	157.13	1	23.939	61	2	2	0	1	3	1	1	0	0	1	0
0	0	1	1	0	1	2	1	1	0	0	1	1	0	156.88	1	19.6927	75	2	3	0	1	3	0	12	0	1	0	0
1	2	0	1	0	1	0	2	0	1	1	2	2	0	64.38	2	21.4844	59	2	2	1	1	3	0	0.42	0	1	0	0
2	1	2	1	1	1	1	1	2	1	1	1	0	3	82.5	2	17.5781	60	2	1	0	0	1	0	1	0	1	0	0
1	1	1	0	0	0	1	0	1	0	1	1	1	0	84.25	1	19.4674	65	2	2	1	1	2	0	2.83	0	1	0	1
1	1	0	0	1	0	0	0	1	2	0	1	1	1	118.92	2	22.8928	57	2	2	0	0	2	1	14.17	0	1	0	0
3	1	2	0	1	2	1	1	1	0	0	2	1	0	76.88	2	24.7676	78	2	3	0	1	2	1	20	0	1	0	0
0	0	0	0	1	0	0	1	3	0	0	0	0	1	179.13	2	24.7676	59	2	1	0	1	1	0	1.5	0	1	0	0
1	1	2	3	1	0	1	0	0	0	1	0	2	1	120.25	2	19.3337	45	2	2	1	1	2	0	5.67	0	1	0	0
1	1	1	0	1	0	0	2	1	0	1	1	1	1	95.75	2	22.7694	64	2	2	0	1	2	0	7	0	1	0	0
0	0	0	0	0	0	0	0	0	0	1	0	0	0	146.96	2	24.677	72	2	3	0	1	3	0	30	0	1	0	0
0	3	0	3	1	3	2	3	1	1	1	2	1	3	27.88	2	24.3418	68	2	2	0	1	1	0	18	0	1	0	0
1	2	2	1	0	1	2	2	1	1	2	1	2	1	69.5	2	20.0287	79	3	1	0	0	1	0	8	0	1	0	0
0	0	0	0	0	0	1	1	1	0	0	0	0	0	172.88	2	20.8117	61	2	1	0	0	1	1	26.83	0	0	0	0
1	1	2	1	0	0	1	0	2	0	1	1	1	0	95.79	2	19.7055	53	2	3	1	1	3	0	14.33	0	0	0	1
1	0	3	1	3	2	2	1	3	2	2	2	1	0	22.38	2	20.3428	35	1	1	0	0	1	1	22.5	0	1	0	0
0	1	0	0	0	0	0	0	2	0	0	0	0	0	183.13	2	20.0288	34	3	3	1	1	3	0	11.33	0	1	0	0
1	2	0	2	1	0	0	2	1	0	0	2	0	0	107.96	2	22.2222	67	3	1	0	0	1	0	0.67	0	1	0	0
2	0	2	2	1	1	2	1	2	0	1	1	1	0	89.25	2	19.8141	63	2	1	0	1	1	0	0.17	0	1	0	0
1	0	0	0	0	1	1	1	1	2	0	1	1	0	108.83	2	23.0469	37	2	1	1	0	2	0	10.17	0	1	0	1
0	1	0	0	0	0	0	1	3	0	1	0	0	0	91.38	2	20.0288	52	2	2	0	1	1	1	15.33	0	1	0	0
1	0	2	0	0	0	0	0	0	0	0	0	1	0	157.5	1	23.5355	67	2	3	0	1	3	1	11	0	0	0	1
1	1	2	2	0	1	2	3	0	1	0	1	0	1	44.5	2	18.75	56	2	1	0	1	1	0	3	0	1	0	0
3	2	3	2	3	3	3	3	3	3	3	3	1	3	63.38	2	23.4375	47	2	2	1	0	2	0	6.5	0	1	0	0
1	1	3	1	3	1	2	1	1	2	1	2	3	0	82.25	2	24.7676	44	2	1	0	0	1	1	24	0	1	0	1
3	2	2	1	2	1	3	3	3	0	2	2	2	0	40.38	2	23.1111	49	2	1	0	0	1	1	24	0	0	0	0
1	1	0	0	0	0	1	2	1	0	0	0	0	0	163.38	2	24.5243	65	2	3	0	1	2	1	32.75	0	1	0	0
1	1	2	1	0	1	1	1	1	1	1	1	1	0	144.54	2	22.2656	50	2	3	1	1	2	0	25.83	0	0	0	1
2	1	2	0	2	1	2	1	1	0	1	1	1	0	76.33	2	16.8962	36	2	2	1	0	1	1	17.33	0	1	0	0
2	1	2	2	2	1	2	0	1	2	2	1	1	0	69.25	2	21.3675	52	2	2	1	1	1	1	0	0	0	0	0
0	0	1	2	1	1	2	0	2	0	2	1	1	0	167.88	2	19.5312	45	2	2	1	1	3	0	0.5	0	1	0	0
0	3	1	0	0	1	0	1	2	3	1	1	1	1	160.38	2	25.0657	58	2	3	0	1	2	0	5	0	0	0	0
0	0	0	0	0	0	1	1	0	0	0	1	1	0	122.88	2	17.7778	13	1	2	0	0	1	0	2	0	0	0	1
0	0	0	2	0	2	1	1	0	0	0	0	1	3	73.63	1	22.2291	56	2	3	1	1	3	0	2	0	1	1	1
0	1	2	0	0	0	0	0	1	0	3	1	1	1	94.63	2	24.6548	46	2	2	1	1	2	0	3	1	1	0	0
2	1	3	1	1	3	3	0	3	1	3	2	2	0	49.5	2	26.3146	63	2	2	0	1	2	0	4.67	0	1	0	0
0	1	0	0	0	0	1	0	1	0	0	0	0	0	169.38	2	23.8751	32	2	3	1	1	2	0	4.5	1	0	0	0
2	1	3	2	2	1	2	1	2	2	2	2	2	1	53	2	22.8516	56	2	2	0	0	1	1	30	0	1	0	0
1	1	2	2	1	1	1	0	1	0	3	1	2	0	53	2	19.5312	39	2	2	1	1	2	1	10	1	1	0	0
0	0	0	1	0	1	2	1	1	2	1	1	1	0	141.46	1	21.4533	40	2	2	1	0	2	0	6.33	0	1	1	1
1	2	2	1	1	1	2	2	2	1	2	1	1	1	76.88	2	27.4756	67	3	1	0	0	1	1	16	0	1	0	0
2	1	2	2	1	1	1	1	2	1	2	1	1	1	60.13	2	23.5304	49	2	2	0	1	1	0	5	0	1	0	0
0	1	3	0	2	3	0	3	3	0	2	2	2	0	65.88	2	25.3906	51	2	2	0	1	1	1	16	0	0	0	0
1	1	2	0	1	2	2	1	2	0	1	1	2	0	67.63	1	24.2215	58	2	2	1	1	3	0	1.5	0	1	0	0
2	1	1	1	3	1	2	2	3	1	1	2	1	0	49	2	24.0346	64	2	1	0	1	1	1	7	1	1	0	0
1	1	2	2	1	0	1	2	1	0	1	1	0	1	85.38	1	21.2585	60	2	2	1	0	1	0	8	1	1	0	0
1	1	2	1	1	1	1	1	3	0	2	1	0	3	36.5	2	24.977	56	2	1	0	1	1	0	1.42	0	1	0	0
1	3	0	0	0	0	0	0	1	0	1	0	0	0	103.75	2	28.6726	51	2	1	0	1	1	0	7.5	0	1	0	0
1	2	2	1	1	1	2	2	1	0	1	1	1	2	93.13	2	16.8663	43	2	2	0	1	3	1	7.5	1	1	0	0
1	1	1	2	2	1	1	1	1	1	0	0	1	0	68.5	2	24.0344	59	2	2	0	1	1	1	10	0	1	0	0
0	0	0	0	0	0	0	0	0	1	1	0	1	0	122.21	2	23.8281	43	2	2	1	0	2	0	0.08	0	1	0	0
1	0	2	0	1	0	1	0	2	0	1	1	0	0	75.25	2	20.8117	71	2	1	0	1	2	0	0.33	0	1	1	1
1	1	1	0	1	1	1	0	1	0	1	1	1	2	126.54	2	24.6548	46	2	2	1	1	2	0	5	0	1	0	0
3	1	2	2	3	3	1	1	1	2	1	1	2	3	116.21	1	20.7612	36	2	1	1	1	2	0	4	0	1	1	1
1	2	2	2	2	2	1	2	1	2	0	1	2	0	74.71	2	21.0938	45	2	2	0	0	1	0	22	0	1	0	1
0	0	0	0	1	0	0	1	0	0	0	0	0	0	184.63	2	19.487	66	2	1	0	1	2	0	2.5	0	1	0	0
2	1	1	1	2	1	1	0	3	3	1	1	1	0	67.75	1	19.5312	58	2	1	1	1	1	1	4	0	1	0	0
1	0	2	0	0	0	0	3	3	0	2	1	1	0	82.13	2	21.7738	62	2	2	0	1	1	0	0	0	0	0	0
2	2	0	2	1	2	0	2	2	3	1	0	0	0	52	2	24.0346	52	2	2	0	1	2	1	4	1	1	0	0
1	3	0	2	3	2	2	3	1	1	0	0	0	0	49	1	19.6283	60	2	2	0	1	3	1	7	0	1	1	1
1	1	1	2	3	2	0	2	1	2	2	1	1	0	60.88	2	29.3848	57	2	1	0	1	1	1	2	0	0	0	0
0	1	2	0	0	0	1	2	1	0	1	1	0	0	103.08	2	17.1468	49	2	2	1	1	1	1	21	0	0	0	0
1	1	2	2	2	1	1	0	1	0	2	2	2	0	81.88	2	31.1111	45	2	2	0	1	1	0	5	0	0	0	0
1	3	3	2	1	1	1	3	0	2	0	1	2	1	91.29	2	23.5883	51	2	2	0	1	1	1	8	0	1	0	1
1	1	1	1	1	1	2	1	1	0	2	2	1	0	65.88	2	18.8189	53	2	2	0	0	1	0	15	0	1	0	0
1	0	0	0	1	1	0	2	1	0	0	0	1	0	110.75	2	26.3465	47	2	2	1	1	2	0	3.5	0	1	0	0
1	0	0	0	0	0	1	0	0	0	1	1	1	0	141.17	2	16.5289	29	2	3	1	1	3	0	5	0	1	0	0
1	1	2	3	0	0	1	1	0	0	1	1	1	1	82.88	2	23.0518	56	2	1	0	1	1	0	20	0	0	0	0
1	1	2	0	1	1	0	1	2	1	1	2	2	1	65.79	2	21.5645	48	2	2	1	1	2	0	23	0	1	0	1
1	3	0	0	0	1	1	0	2	0	1	1	1	1	88.13	2	23.0469	71	2	3	1	1	2	0	3	0	1	0	0
2	3	3	2	2	2	2	1	0	2	2	2	1	0	51.88	1	24.9135	59	2	2	1	1	2	0	0.5	0	0	0	1
1	0	0	2	0	0	1	0	0	0	0	1	0	0	127.29	2	22.0386	43	2	2	1	0	2	0	0.75	0	0	0	0
0	1	0	1	0	0	0	0	0	0	0	0	1	0	143.17	2	28.9811	44	2	2	1	1	3	0	0.5	0	0	0	0
2	0	2	2	1	1	2	0	2	0	1	1	1	0	76.33	2	22.1003	49	2	2	1	0	2	0	0.1	0	0	0	0
1	2	1	0	0	0	1	0	2	0	0	1	0	0	173.88	2	18.8271	21	1	2	1	0	1	0	3	0	1	0	0
1	1	0	2	1	0	1	2	2	1	0	0	0	0	56.63	2	23.4375	65	2	2	0	0	1	0	26	0	1	0	0
1	3	2	0	0	1	2	1	1	0	0	1	1	1	72.5	2	20.9572	51	2	2	0	1	2	0	3	0	0	0	0
0	0	0	0	0	0	1	0	0	0	0	0	1	0	130.38	2	20.9366	53	2	2	1	1	2	0	25	0	1	0	0
0	0	0	0	1	0	0	0	3	0	1	1	0	0	93.13	2	21.6311	65	2	1	0	1	2	0	0.42	0	1	0	0
1	2	1	0	1	0	1	2	1	0	2	1	1	1	80.88	2	23.3091	66	2	1	0	1	2	0	1.5	0	1	0	0
3	0	0	0	0	1	0	0	0	0	0	0	0	0	74.5	2	22.3081	65	2	2	0	1	2	0	0.25	0	1	0	0
2	0	0	0	0	0	0	0	0	0	0	0	0	0	105.63	2	26.0375	42	2	2	1	1	2	0	0.42	0	1	0	0
1	2	2	2	1	1	1	1	1	0	2	2	1	1	113.63	2	15.9439	42	1	1	0	0	1	1	16	0	1	0	0
0	1	1	0	0	0	2	0	0	0	0	0	0	0	127.21	2	23.3091	45	2	1	1	0	1	1	20	0	1	0	0
0	0	0	0	0	0	0	3	1	0	0	0	0	0	107.5	2	19.4734	29	2	1	0	0	1	1	0.1	0	0	0	0
0	0	0	0	0	0	0	0	1	0	0	0	0	0	58.38	2	27.3438	52	2	1	0	0	1	1	20	0	1	0	0
1	2	2	0	1	0	0	0	2	0	1	1	1	1	139.5	2	20.9644	33	2	1	1	0	1	1	14	0	0	0	0
0	0	1	0	0	0	0	0	1	0	0	0	0	0	138.63	2	27.1809	49	2	1	1	0	1	1	17	0	0	0	0
0	1	0	0	1	0	0	0	0	0	0	1	0	0	83.5	2	23.7332	59	2	1	1	3	1	1	10	0	1	0	0
1	3	2	1	1	0	1	3	0	1	1	1	0	3	64.63	2	23.3844	65	2	1	0	1	1	1	8	0	1	0	0
1	0	0	0	0	0	1	1	2	0	0	1	1	1	91.71	2	27.5312	58	2	1	0	1	2	1	26	0	1	0	0
1	1	2	2	2	2	0	1	0	1	1	1	1	0	108.88	2	27.3438	36	2	1	0	0	1	1	1.1	0	0	0	0
0	0	0	0	0	0	1	1	3	0	0	0	0	0	174.13	2	23.1405	36	2	1	1	1	2	1	3.5	0	1	0	0
1	0	1	0	0	0	0	0	2	0	0	1	1	0	98.5	1	20.7612	46	2	1	1	1	2	1	0.7	0	0	1	1
2	2	2	1	1	2	2	1	0	1	1	1	1	2	75.71	2	20.7031	51	2	1	1	1	1	1	11	0	0	0	0
0	0	1	0	1	0	1	2	1	0	2	1	0	0	90.46	2	21.0828	43	2	1	1	1	1	1	0.5	0	1	0	0
1	0	1	0	1	1	1	1	0	1	0	0	0	0	162.13	2	27.4348	29	2	2	0	1	1	1	0.3	1	0	0	1
1	3	0	2	0	2	0	3	2	1	0	1	1	0	73.83	2	17.2248	48	2	1	1	1	2	1	7	0	1	0	0
2	3	0	2	3	2	2	3	0	2	0	2	0	2	45.88	2	21.0938	66	2	1	1	1	1	1	20	0	1	0	0
0	0	0	0	0	0	1	3	0	0	0	0	0	0	131.38	1	23.6614	38	2	1	0	1	1	1	3	0	1	1	1
1	3	2	0	1	0	0	3	0	0	1	0	0	0	107	2	19.9792	68	2	1	1	1	1	1	1.1	0	1	0	0
1	1	2	2	1	1	1	2	1	1	1	1	1	1	73.88	2	16.5289	38	2	1	0	1	2	1	8	0	1	0	0
1	0	0	1	2	0	0	3	1	1	1	0	0	0	105	2	31.1634	49	2	1	1	1	1	1	1.5	0	0	0	0
0	0	0	0	0	3	0	3	1	0	0	0	3	0	143.5	1	22.9568	80	2	1	1	1	3	1	0.1	0	1	0	1
1	0	0	0	1	0	0	2	3	0	1	0	1	1	140.63	2	23.7332	56	2	1	1	1	1	1	4	0	0	0	0
1	0	2	0	1	0	0	3	2	0	1	1	1	0	133.29	2	23.2335	51	2	1	0	1	3	1	8	1	0	0	0
1	0	0	0	1	0	0	3	2	0	1	1	0	0	88	2	22.68	59	2	1	1	1	2	1	11	0	1	0	0
1	2	0	0	2	1	2	3	1	0	1	1	0	1	106.88	2	18.7305	37	2	1	1	1	1	1	5	0	1	0	0
1	0	0	0	1	0	0	0	0	0	0	1	0	0	93.25	2	18.6709	45	2	1	1	1	1	1	21	0	1	0	0
0	1	1	0	0	0	0	1	0	0	0	1	0	0	101.13	2	18.026	52	2	1	1	1	1	1	0.1	0	0	0	0
1	2	1	0	1	0	1	1	0	0	1	1	0	0	161.63	2	25.2994	57	2	1	1	1	1	1	5	0	1	0	0
0	0	0	0	0	0	0	3	0	0	0	1	0	0	166.13	2	12.3603	50	2	1	1	1	2	1	7	0	1	0	0
3	0	1	0	0	0	0	1	3	0	0	1	1	0	158.38	1	20.4491	39	2	1	1	0	1	1	2	0	0	1	0
1	0	1	0	0	0	0	3	3	0	0	0	0	0	114.38	2	18.026	64	2	1	1	1	1	1	2	0	1	0	0
1	0	0	0	0	0	0	0	0	0	0	0	0	0	178.38	2	22.2137	41	2	1	1	1	1	1	10	0	1	0	0
1	2	2	2	1	1	2	1	0	2	2	1	1	2	31.63	2	17.7778	59	2	1	1	1	1	1	18	1	1	0	0
1	1	1	1	0	0	1	1	1	1	2	1	0	0	143.17	2	18.5911	23	1	2	0	0	1	1	5	1	0	0	0
2	2	2	1	1	2	0	0	0	1	0	1	2	0	113.63	2	19.5918	67	1	1	1	1	1	1	0.3	0	0	1	1
1	1	2	1	1	1	1	1	1	1	1	1	2	0	84.79	2	22.5827	56	2	1	1	1	1	1	30	0	1	0	0
0	0	1	0	0	0	0	3	0	0	0	0	0	0	136.13	1	21.9713	59	2	1	1	1	1	1	1	1	1	0	0
2	3	0	2	0	1	2	0	0	1	0	2	0	0	39.88	2	23.634	61	2	1	1	1	1	1	6	0	1	0	0
1	1	0	0	0	0	0	3	0	0	0	1	0	0	168.38	2	19.1406	80	1	1	1	1	1	1	0.1	0	0	0	0
1	3	2	0	2	0	0	3	0	0	1	1	0	1	75	2	27.0552	58	2	1	1	1	1	1	6	0	0	0	0
0	0	1	0	0	0	1	1	0	0	0	0	0	0	156.63	2	18.424	57	2	1	0	1	1	1	26	0	1	0	0
3	1	2	0	0	0	0	1	2	0	1	0	1	0	144.92	2	18.902	56	2	1	1	1	1	1	2	0	0	0	0
0	1	1	0	0	0	1	1	1	1	0	1	0	0	120.92	2	21.6441	78	2	1	0	1	2	1	0.2	0	0	0	0
3	0	0	1	0	0	0	0	0	0	0	1	1	0	162.75	2	20.4491	33	2	2	1	1	2	1	8	0	0	0	0
1	0	1	1	2	1	1	1	2	0	2	1	2	1	67.13	2	24.0346	61	2	1	1	0	3	1	1	0	1	0	0
1	1	2	2	3	1	2	0	3	2	1	3	2	0	75.88	1	22.8624	50	2	1	1	0	1	1	1	1	1	1	1
0	0	0	0	0	0	0	3	1	0	0	0	0	0	139.88	2	23.7812	57	2	1	1	1	1	1	2	0	0	0	1
1	2	1	0	1	1	1	2	1	2	2	1	1	1	68.88	2	19.5312	36	2	1	1	1	1	1	5	0	1	0	0
1	0	0	0	1	0	0	0	1	0	1	1	1	0	135.38	2	23.2335	52	2	1	1	1	2	1	0.1	0	0	0	0
1	1	2	0	1	0	1	1	3	0	1	1	1	1	102.5	2	26.0262	52	2	1	1	1	1	1	1	0	0	0	1
0	0	0	0	0	0	0	0	0	0	0	0	0	0	162.88	2	21.4844	58	2	1	0	1	1	1	4	0	1	0	0
0	0	1	0	0	0	0	3	1	0	0	0	0	0	132.71	2	27.0552	46	2	1	1	1	1	1	5	0	0	0	0
1	0	0	0	0	0	0	3	1	0	0	0	0	0	142.13	1	20.0796	59	2	1	1	1	1	1	4	0	0	1	0
1	0	0	0	1	0	0	1	0	0	0	0	0	0	91.38	2	21.875	41	1	1	0	0	1	1	29	0	1	0	0
1	0	0	0	0	0	0	3	0	0	1	0	0	0	79	2	26.6299	46	2	1	1	0	1	1	0.1	0	1	0	0
0	0	0	0	0	0	0	3	0	0	0	0	0	0	91.25	1	22.4103	61	2	1	1	1	2	1	0	0	1	0	1
1	0	1	1	1	0	0	3	0	1	0	1	1	0	47.88	2	25.3906	51	2	1	1	1	1	1	35	0	1	0	0
1	0	2	0	0	0	3	0	1	2	0	0	0	1	97.25	2	19.5312	51	2	1	1	1	1	1	0.1	0	1	0	0
1	1	0	0	0	0	0	3	0	0	1	1	0	0	85.13	2	27.3438	78	1	1	0	1	1	1	2	0	1	0	0
1	0	2	2	2	1	0	1	2	2	1	1	2	0	108.13	2	20.5714	39	2	1	0	0	1	1	5	0	1	0	0
1	0	0	2	0	2	1	3	0	3	0	2	0	0	49.88	1	21.3041	60	2	1	1	1	3	1	35	0	1	1	0
1	0	0	0	1	0	0	0	0	0	0	1	0	0	87.5	1	18.5185	66	2	2	1	1	2	1	20	0	1	1	1
1	3	1	0	3	1	0	0	0	2	1	1	1	0	80.75	2	25.3906	38	2	1	0	0	2	1	2.5	0	0	0	0
1	1	3	1	1	1	2	1	2	0	1	1	0	1	81.63	2	22.0386	64	2	1	1	1	1	1	0.3	1	0	0	0
1	1	2	1	2	2	0	2	1	1	0	1	1	0	170.38	1	24.1672	48	2	1	1	0	1	1	20	0	1	1	0
1	1	2	1	2	2	2	1	0	2	2	2	1	2	97.63	2	24.4444	57	2	1	1	1	1	1	4.5	0	0	0	0
1	3	0	0	0	0	0	0	2	0	1	1	0	0	88	1	19.3698	80	2	1	1	1	1	1	0.1	0	1	0	0
2	3	2	3	2	1	1	3	0	2	0	2	0	1	27.5	2	13.3333	70	2	1	1	0	1	1	14.5	0	1	0	0
1	0	0	0	0	0	0	0	0	0	0	1	0	0	146.25	2	20.0288	34	2	1	1	0	3	1	3	0	1	0	0
1	1	3	2	3	2	0	0	3	1	0	1	1	0	46.38	2	18.5901	51	2	1	0	0	2	1	0.3	0	1	0	1
2	0	2	0	1	1	2	1	1	0	2	1	1	0	51.13	2	19.8413	29	2	2	0	1	3	1	1	0	1	0	0
1	0	2	1	1	0	0	3	0	1	0	1	1	0	58.25	2	14.0202	77	2	1	1	1	2	1	2	0	1	0	0
2	1	1	2	3	2	1	3	0	2	1	1	1	3	74.5	2	21.0938	70	2	1	1	1	2	1	0.3	0	1	0	0
2	3	3	1	2	2	2	2	1	2	2	2	2	3	37.13	2	19.8347	42	2	2	1	1	2	1	11	0	1	0	0
1	3	0	2	1	2	0	0	0	2	0	1	0	0	84	2	24.8889	67	2	1	1	1	1	1	1.5	0	1	0	0
0	0	0	0	0	0	0	1	0	0	0	0	0	0	128.38	2	31.1111	52	2	1	1	3	3	1	10	0	1	0	0
1	2	0	0	0	0	0	0	1	0	1	0	0	0	126.63	2	18.3594	49	2	1	1	0	1	1	2	0	1	0	0
1	1	1	0	0	0	0	0	1	0	0	0	0	0	141.38	2	23.1399	65	2	1	1	1	1	1	1.5	0	1	0	0
1	1	1	0	1	0	1	1	1	1	1	1	1	0	81.5	2	19.2894	42	2	1	1	1	2	1	4	0	1	0	0
1	0	0	1	1	0	1	3	0	0	1	1	1	2	119.38	2	26.7094	50	2	1	1	1	1	1	3	0	1	0	0
1	1	2	1	1	1	0	1	3	0	0	0	3	2	96.25	2	19.8347	47	2	1	0	1	2	1	15	0	1	0	0
0	0	0	0	0	0	0	0	1	0	0	0	1	0	121.88	2	22.7583	52	2	1	1	1	2	1	3	0	1	0	0
1	3	1	0	1	0	0	3	0	0	0	0	0	0	42.63	2	19.9219	57	2	1	0	1	1	1	16	0	1	0	0
1	0	0	0	0	0	0	3	0	0	0	0	0	0	95.13	2	20.5693	62	2	1	1	0	1	1	6	0	1	0	0
1	3	1	3	0	2	3	3	0	1	0	1	0	0	49.25	2	18.75	66	2	1	1	0	1	1	4.1	0	1	0	0
1	1	1	0	0	0	0	3	1	0	1	0	1	2	111.38	2	23.0681	54	2	1	1	0	1	1	10	0	1	0	0
3	1	2	2	1	0	0	0	0	0	1	2	1	1	65.17	2	19.2894	45	2	1	1	0	1	1	13	0	0	0	0
1	0	0	1	1	0	0	3	0	1	0	1	0	0	153.75	2	20	44	2	1	1	1	1	1	4	0	1	0	0
1	3	0	2	3	2	0	3	0	3	0	2	0	0	34	1	18.937	51	2	1	1	1	3	1	9	0	1	0	0
2	1	1	0	1	0	1	2	1	1	1	1	0	0	66.38	2	20.9572	33	2	1	0	0	3	1	3	0	1	0	0
0	0	0	0	0	0	0	0	0	0	0	1	0	0	106.38	2	26.2222	58	2	1	1	1	1	1	0.05	0	0	0	0
0	3	0	2	0	0	0	1	0	1	0	0	0	0	138	1	17.3589	59	2	1	0	1	1	1	6	0	0	1	0
1	1	2	2	1	1	0	2	0	0	2	1	2	0	90.5	2	19.2277	38	2	1	1	1	2	1	0.5	0	1	0	1
1	3	0	1	0	0	0	3	3	2	0	1	2	0	93.5	2	19.1001	61	2	1	1	1	1	1	0.1	0	1	0	0
3	3	0	0	3	2	2	3	0	0	0	0	0	3	36.25	2	20.0288	66	2	1	1	1	1	1	0	0	1	0	0
1	0	2	0	0	0	0	1	1	0	1	0	0	0	119	2	22.5896	65	2	1	1	0	1	1	20	0	0	0	1
1	2	1	0	0	0	1	0	1	0	2	1	1	1	106.21	2	22.9398	52	2	1	0	1	2	1	0.5	0	0	0	0
0	3	0	0	0	0	0	0	1	0	0	0	0	0	137.63	2	20.3244	39	2	1	1	1	1	1	10	0	0	0	1
0	0	2	0	0	0	0	0	3	0	0	1	0	0	119.08	1	26.0375	59	2	2	0	0	2	1	1	0	0	0	0
2	1	2	1	0	2	2	1	1	1	1	1	1	2	87.88	1	23.6614	57	2	1	1	1	3	1	10	0	1	1	1
0	0	0	0	0	0	0	3	0	0	0	0	0	0	187.63	1	22.5896	84	2	1	0	1	1	1	12	0	0	1	0
1	0	1	0	0	0	0	0	0	0	0	1	1	0	86.25	1	18.75	28	2	1	0	1	2	1	15.5	0	1	0	0
1	0	1	0	0	0	0	3	0	1	2	1	0	0	87.88	2	34.2222	56	2	1	0	1	1	1	0.5	0	1	0	0
0	1	0	0	0	0	2	0	0	1	0	1	0	0	160.38	2	20.0773	25	1	2	0	1	1	1	0.7	1	1	0	1
1	0	1	0	2	0	0	3	3	0	2	1	1	0	131.88	2	28.0404	53	2	1	0	1	1	1	0.1	0	0	0	0
1	3	1	0	2	2	1	3	3	1	0	1	0	0	39.13	2	15.1111	68	2	1	1	1	1	1	5	0	1	0	0
2	3	0	3	3	2	2	3	2	3	2	3	1	1	76.38	2	23.1111	60	2	1	0	0	2	1	10	0	1	0	0
1	2	1	2	1	1	1	1	2	0	1	1	1	1	107	2	19.5312	48	2	1	0	1	1	1	0	0	0	0	0
0	1	0	0	0	0	2	0	0	1	0	1	0	0	160.38	2	24	17	1	1	0	0	1	1	0	0	0	0	0
1	1	0	0	0	0	0	0	1	0	0	1	0	0	92	1	24.4473	66	2	1	1	1	2	1	0	0	0	1	0
2	0	2	2	2	2	2	3	0	1	0	2	1	2	49.38	2	25.0995	50	2	1	1	1	1	1	9	0	1	0	0
0	0	0	0	0	0	0	3	0	0	0	0	2	0	161.5	2	23.03	60	2	2	0	1	3	0	12	0	0	0	0
0	1	0	2	0	0	1	2	2	0	0	1	1	1	125.21	1	24.8016	69	2	1	0	0	3	1	5	1	0	0	0
0	1	0	0	0	0	0	1	2	0	0	0	0	0	173	1	22.0386	63	2	1	0	0	3	0	3.5	0	0	0	0
1	1	0	2	1	1	1	1	1	2	2	1	1	1	74	2	19.6283	69	2	3	0	0	3	1	5	0	0	0	0
2	2	2	1	3	1	2	1	2	2	0	2	0	2	49	2	26.9531	68	2	1	0	0	3	1	4	0	1	0	0
1	3	2	3	0	2	2	0	1	1	1	1	0	1	66.08	1	24.4473	74	2	1	0	0	3	0	1	1	0	0	0
0	3	0	1	0	1	1	3	0	1	0	0	0	1	99.88	2	22.8928	66	1	1	0	0	3	0	4	0	0	0	0
1	2	0	2	2	3	1	3	3	2	2	2	0	2	119.88	2	24.6548	65	2	2	0	1	2	1	29	0	1	0	0
0	3	0	0	0	0	1	1	0	0	0	0	0	0	156.13	1	22.1003	65	2	1	0	1	1	1	1.5	0	1	0	0
1	1	2	1	2	1	1	1	1	1	2	2	0	3	149.25	2	28.125	29	2	3	0	4	3	0	3	0	1	0	0
0	1	0	2	1	1	1	2	0	0	0	0	1	0	133.88	2	26.7759	70	2	1	0	0	3	1	6	0	0	0	0
0	0	0	1	0	0	0	2	0	0	0	0	0	0	170.75	2	20.0288	66	2	2	0	0	3	0	3	1	0	0	0
1	1	2	0	1	0	2	0	1	0	2	1	1	0	138.83	2	20.5078	58	2	2	0	0	3	0	20	0	0	0	0
2	1	2	0	0	0	0	0	1	0	1	1	1	0	125.75	2	22.6003	30	2	3	0	0	3	0	4	0	1	0	0
1	1	1	0	1	1	0	0	2	1	1	1	1	0	75.13	2	20.5499	58	2	3	0	0	3	0	10	0	0	0	0
0	0	0	0	0	1	0	0	2	0	1	1	0	0	153.25	2	26.2985	65	3	1	0	0	3	0	6	0	0	0	0
1	1	2	1	0	1	1	2	2	1	1	1	1	1	91.13	1	24.8016	70	3	2	0	0	3	1	7.5	0	0	0	0
0	3	0	3	0	0	1	2	0	1	0	0	0	0	120.13	2	27.3438	44	2	1	0	0	3	0	6	0	0	0	0
1	3	1	2	1	1	1	3	0	1	0	1	1	0	130.63	2	23.8751	75	2	1	0	0	3	1	0.5	0	1	0	0
1	0	2	1	1	1	1	1	1	0	1	1	1	1	53.5	2	16.1616	69	2	2	0	0	1	1	17	0	0	0	0
0	0	0	0	0	0	0	0	1	0	0	0	0	0	182.63	1	22.0932	65	2	2	0	0	3	0	2	1	0	0	0
1	2	0	2	0	2	1	2	0	1	0	1	0	1	112.88	2	17.5781	69	2	3	0	0	3	1	2	0	0	0	0
1	2	1	0	0	0	1	2	1	1	0	0	0	0	152.38	2	18.9453	50	2	1	0	1	3	0	3	0	0	0	0
0	0	0	0	0	0	0	0	0	0	0	0	0	0	126.58	2	24.2188	21	1	3	0	5	2	0	0	0	0	0	0
1	0	0	0	0	0	0	0	0	0	0	0	0	0	136.88	2	23.2335	51	2	1	0	1	3	0	0	0	0	0	0
1	1	1	1	1	1	2	1	0	0	1	1	2	0	154.25	2	25.2994	84	3	2	0	0	3	1	26	0	1	0	0
1	0	1	0	0	0	0	0	0	0	0	1	0	0	176	2	24.841	66	2	3	0	0	3	0	2	0	0	0	1
0	0	0	0	0	0	0	0	0	0	0	0	0	0	160.13	2	21.4844	45	2	3	0	0	3	0	1	0	0	0	0
0	3	0	3	1	3	3	3	0	3	1	2	0	3	161.38	1	25.6055	63	2	1	0	0	3	1	3	0	0	0	0
0	3	0	1	0	1	1	1	0	0	0	0	0	0	113.5	2	20.1348	71	2	1	0	0	2	1	15	0	0	0	0
1	0	2	0	0	0	1	0	0	0	0	1	0	0	159.88	2	25.2174	51	2	1	0	0	3	0	12	0	0	0	0
1	1	0	0	1	0	1	0	1	0	1	1	1	3	124.88	2	22.1003	48	2	3	0	4	3	0	2.5	0	0	0	0
1	2	1	2	1	0	2	1	2	1	1	1	0	1	157.38	2	17.6693	65	2	1	0	0	2	0	19	0	0	0	0
1	0	0	0	0	0	1	0	0	0	0	0	0	0	168.75	2	22.8624	46	2	3	0	4	3	0	9	0	1	0	1
0	0	0	0	0	0	0	1	0	0	0	0	0	0	140	1	20.5151	40	2	3	0	4	3	0	2.5	0	0	0	0
1	0	1	0	0	0	1	0	2	0	1	1	0	1	180.25	2	19.8413	51	2	2	0	4	3	0	2	0	0	0	0
1	0	0	0	0	0	1	3	0	0	0	0	0	1	170.13	2	26.6728	54	2	1	0	1	2	0	0	0	0	0	0
0	0	0	0	0	1	1	1	0	0	0	0	0	1	167.5	2	29.1363	74	3	3	0	0	3	1	1	0	0	0	0
1	2	3	2	2	3	1	3	1	2	0	1	2	0	96.38	2	22.8928	53	2	1	0	1	3	0	1.5	0	0	0	0
1	1	0	1	1	1	2	1	2	2	1	1	2	1	113.88	2	26.7094	67	2	2	0	0	3	0	16	0	1	0	0
1	1	1	1	2	2	1	1	2	2	3	1	1	0	81.38	2	17.5781	57	2	2	0	0	3	0	6	0	1	0	0
1	0	2	1	0	0	1	1	0	0	1	1	1	1	158.13	1	26.0262	72	2	2	0	0	3	1	3	0	1	1	1
1	0	2	2	1	1	2	1	1	1	1	2	1	1	126.79	1	24.4898	35	1	3	0	0	3	0	4	1	0	1	1
0	1	0	0	0	0	0	0	0	0	0	0	0	0	164	1	22.9568	58	2	2	0	4	1	0	0	0	0	0	0
1	1	2	0	1	1	0	0	2	0	1	0	0	0	135.88	2	20.5499	63	2	2	0	0	3	0	6	0	1	0	0
0	1	0	0	0	0	0	2	0	0	0	0	0	0	135.63	1	21.2585	54	2	1	0	4	3	0	1	0	1	1	1
2	3	3	1	2	3	2	1	0	3	1	1	2	0	71.75	2	27.3438	76	3	1	0	0	3	1	6	0	0	1	1
1	2	2	2	0	1	1	3	1	1	2	1	1	1	138.75	2	23.03	66	2	2	0	0	3	1	25	1	0	0	0
0	0	0	0	0	0	1	2	0	0	0	0	0	0	131.75	1	30.7787	70	2	3	0	0	3	1	12	0	1	0	0
2	3	3	3	2	2	1	3	0	2	0	1	1	1	64.5	2	22.4273	87	3	1	0	0	3	1	30	1	0	0	0
1	1	1	2	1	2	0	3	1	1	1	1	1	0	128.75	2	23.1247	57	2	3	0	0	3	1	6	0	0	0	0
0	0	0	0	0	0	1	1	0	0	0	0	0	0	142.75	1	21.551	67	1	2	0	0	3	0	2	1	0	0	0
1	1	0	0	0	0	1	2	0	0	0	0	1	0	136.5	2	22.0317	67	2	2	0	0	3	1	6	0	1	0	0
1	2	2	2	2	1	1	2	0	2	1	1	1	0	120.13	2	22.0317	67	2	1	0	0	3	0	4	0	0	0	0
1	3	0	1	0	0	0	1	0	0	0	0	1	0	95.75	2	21.875	60	2	1	0	1	2	1	0	0	0	0	0
0	0	0	0	0	0	0	0	0	0	0	0	0	0	134.75	2	21.6128	37	2	2	0	0	3	0	0	0	0	0	1
0	0	0	0	1	0	1	0	0	0	0	0	0	0	145.5	2	22.6562	48	2	1	0	4	3	0	12	0	1	0	0
1	1	1	0	0	0	1	0	0	0	0	0	1	0	130.75	2	30.1162	70	2	2	0	0	3	1	1	0	0	0	0
1	2	0	0	0	0	1	0	0	0	0	1	1	2	132.25	2	22.0317	73	2	2	0	0	3	1	5	1	1	0	0
0	0	2	0	0	0	1	1	2	0	0	0	0	1	117.83	2	22.0317	59	2	2	0	0	3	1	2	0	0	0	0
1	1	0	2	1	0	1	2	2	1	1	1	1	1	95.33	2	28.0404	62	2	2	0	0	3	1	7	0	1	0	0
1	0	0	1	0	1	0	3	1	0	0	0	1	0	154.13	2	20.9572	69	3	1	0	0	3	0	1	0	0	0	0
1	1	1	0	0	0	1	3	2	0	1	1	1	1	149.13	1	34.6021	48	2	3	0	0	3	0	0	0	0	0	0
1	0	0	0	0	0	0	0	1	0	0	0	0	0	167.63	2	23.2434	67	2	3	0	0	3	0	51	1	0	0	0
0	2	0	0	1	0	1	0	1	0	1	1	0	1	162.29	2	22.5827	36	2	2	0	0	3	0	6	0	0	0	0
1	0	0	0	1	1	1	1	0	1	1	1	1	0	101.92	2	27.3438	74	2	1	0	0	3	1	5	1	0	0	0
1	0	0	3	0	0	1	0	1	0	0	0	1	1	126.13	1	23.3234	67	2	1	0	0	3	1	7	1	0	1	1
1	1	0	0	0	0	2	3	1	0	2	1	1	1	142.63	2	23.6128	43	2	1	0	5	3	0	20	0	1	0	0
1	0	0	0	0	0	1	3	1	0	0	0	0	0	140.88	2	26.6667	74	3	1	0	0	2	1	1.5	0	0	0	0
1	3	0	2	1	1	3	3	0	2	0	1	0	0	42.5	2	18.026	64	2	1	0	0	2	1	0	0	0	0	0
0	3	0	2	0	1	2	3	1	1	0	1	0	0	112.04	2	23.5304	66	2	1	0	1	2	1	24	0	1	0	0
0	0	0	0	1	0	0	1	2	0	0	0	1	1	168.63	1	18.8092	56	2	3	0	4	3	0	0	0	0	0	0
1	1	0	1	0	0	0	3	3	0	0	0	0	3	90.5	2	24.974	65	2	1	0	0	3	1	3	1	0	0	0
1	0	0	2	3	1	2	3	3	1	3	1	3	0	108.88	2	21.875	60	2	1	0	4	3	1	2	0	1	0	0
1	0	0	2	1	1	1	3	3	1	0	1	1	1	125.17	1	21.4844	73	2	1	0	0	2	0	0	0	0	0	1
1	1	1	2	2	1	1	2	1	2	0	1	0	3	41.38	2	25.7117	70	3	2	0	0	3	1	1	0	0	0	0
1	1	1	2	2	1	2	3	1	1	0	1	0	2	63.38	2	19.5312	39	2	1	0	1	2	0	2	0	0	0	0
0	0	0	2	0	1	1	0	0	0	0	0	3	0	139.38	1	24.0741	50	2	2	0	4	3	0	3	0	1	1	1
1	1	0	0	0	0	1	0	0	0	0	0	0	0	116.38	2	19.5312	62	2	2	0	1	3	0	0	0	0	0	0
1	3	2	1	0	1	1	0	0	1	1	1	1	1	111.13	2	19.8347	54	3	1	0	1	2	1	10	0	1	0	0
0	0	0	0	0	0	0	1	0	0	0	1	1	0	143.13	1	23.5102	70	2	2	0	0	3	1	0	0	0	0	0
1	2	2	1	2	1	1	1	1	1	1	1	1	1	71.13	2	25.2174	51	2	3	0	0	3	0	4	0	1	0	0
1	0	1	0	1	0	1	0	0	0	0	0	0	0	179	2	19.6072	25	1	3	0	5	3	0	7	0	1	0	0
1	0	0	0	0	0	0	0	0	0	0	0	0	0	172.63	2	16.8242	58	2	3	0	0	3	1	8	0	0	0	0
0	0	0	0	0	0	0	0	0	0	0	0	0	0	170.88	2	26.7094	65	2	2	0	0	3	0	5	0	0	0	0
1	3	1	2	1	1	1	0	1	1	3	1	0	1	73.88	2	22.8624	50	3	1	0	1	1	1	14	1	1	0	0
1	0	1	1	0	0	1	0	2	0	1	1	1	1	136.21	2	20.0474	34	3	2	0	0	3	0	1	1	0	0	0
0	1	0	0	0	0	0	0	0	0	0	0	0	1	161.88	1	22.4913	65	2	2	0	0	3	1	0	0	0	1	1
1	3	2	1	0	0	1	2	0	1	3	1	1	1	126.63	2	26.0375	60	2	1	0	0	3	1	0	0	0	0	0
1	0	0	0	0	0	1	0	2	0	0	0	0	0	150.88	2	23.5237	61	2	2	0	0	3	1	2	0	0	0	0
0	0	0	0	0	0	0	1	0	0	0	0	0	0	175.13	2	17.4449	60	2	1	0	0	2	1	4	1	0	0	0
0	1	0	1	0	0	0	0	2	0	0	1	0	1	168.13	2	25.1532	60	2	1	0	0	3	0	10	0	1	0	0
1	0	0	0	0	0	0	0	0	0	0	0	0	1	132.13	1	29.4118	47	2	1	0	0	3	1	0	1	0	1	1
1	1	0	2	1	0	1	1	0	1	0	1	0	0	146.63	1	18.937	72	2	1	0	0	3	1	29	0	1	1	1
0	0	1	0	0	0	0	1	0	0	0	0	1	0	146.38	2	25.9516	57	2	1	0	0	3	0	1	1	0	0	0
1	2	1	1	1	1	2	1	2	2	0	2	1	1	76.75	2	16.8962	57	2	1	0	0	2	0	30	0	1	0	0
1	1	1	2	2	1	2	2	2	2	1	1	1	1	115.04	2	23.8751	52	2	1	0	1	2	0	1	0	1	0	0
0	1	0	1	1	0	0	1	1	1	0	0	0	0	170.38	2	24.3141	53	2	1	0	0	2	0	11	0	1	0	0
1	1	1	1	1	1	1	2	1	1	2	2	0	1	111.92	2	17.782	30	3	3	0	0	3	0	0	0	0	0	1
0	2	0	1	0	1	1	1	0	0	1	0	0	1	134.88	2	21.4844	68	2	1	0	0	3	1	12	0	1	0	0
0	0	0	1	0	0	1	3	0	1	0	0	0	1	141.88	2	24.6548	71	3	1	0	0	3	1	4	0	1	0	0
1	1	2	1	0	0	0	3	1	1	1	1	1	1	150.04	2	24.0346	56	2	1	0	1	1	1	0	0	0	0	0
0	0	2	2	1	1	1	0	0	0	1	1	1	1	145.13	2	22.2656	50	2	2	0	4	3	0	0	0	0	0	0
0	0	0	0	0	0	1	0	1	0	0	0	0	1	170.88	2	21.4536	55	2	2	0	0	3	0	1	1	0	0	0
1	0	1	0	1	0	0	0	0	0	1	1	1	0	103.54	2	23.4375	53	3	3	0	4	3	0	0	1	0	0	0
0	0	0	0	0	0	1	0	0	0	0	0	0	0	158.38	2	22.4766	60	2	3	0	0	3	0	6	1	1	0	0
0	0	0	0	0	0	0	1	0	0	0	1	0	0	149.38	1	18.8272	59	2	2	0	4	3	1	1	0	1	0	0
1	2	3	2	2	1	1	0	2	1	1	1	1	1	121.75	2	21.6311	57	2	2	0	0	3	0	7	1	1	0	0
0	0	0	0	0	0	0	0	1	0	0	0	0	0	177.13	1	29.0606	65	2	2	0	1	3	1	0	0	0	0	0
1	2	3	1	2	2	1	0	1	2	2	2	1	1	91.38	2	23.03	58	2	1	0	0	3	1	1	0	0	0	0
0	1	0	1	0	1	0	0	0	0	0	0	0	0	166.38	2	24.1117	58	2	2	0	0	3	0	23	0	1	0	0
1	2	2	3	2	1	2	3	2	2	1	1	0	1	82.75	2	25.2994	75	2	2	0	0	3	1	1	0	1	0	0
0	3	0	1	0	1	1	2	0	0	0	0	0	1	75.5	2	18.7305	80	2	2	0	0	3	0	20	0	1	0	0
1	1	0	2	0	1	1	2	0	1	0	1	1	1	141.63	2	19.052	65	2	3	0	0	3	0	17	0	0	0	0
1	1	1	1	1	1	1	3	1	1	1	1	1	0	154.38	2	18.8707	43	2	2	0	0	3	0	6	0	0	0	0
1	1	1	2	0	1	2	1	0	1	1	1	1	2	122.88	2	22.6003	38	2	3	0	4	3	0	1	0	0	0	0
1	3	1	2	2	2	2	3	0	2	0	3	0	2	51.88	2	25.1559	73	3	2	0	0	3	1	0	0	1	0	0
1	1	0	1	0	2	0	1	1	1	1	1	1	1	127	2	23.4375	49	2	2	0	0	3	0	4	0	1	0	0
0	0	2	0	0	1	1	2	0	0	1	0	1	0	130	2	23.4375	66	2	3	0	0	3	0	24	0	1	0	0
0	1	0	1	0	0	1	2	0	1	0	0	0	0	159.75	1	22.0386	81	2	3	0	0	3	1	3	0	0	0	0
1	1	2	1	1	2	2	1	1	0	1	1	1	0	75.13	1	22.4913	35	2	1	0	4	2	1	4	0	0	0	0
0	0	0	0	0	0	1	0	0	0	0	0	0	0	161.75	2	27.3438	58	2	2	0	0	3	0	0	0	0	0	0
1	1	0	2	1	1	0	2	0	1	0	1	1	1	168.38	2	22.3214	39	1	3	0	0	3	0	3.5	0	0	0	0
0	1	0	0	0	0	1	0	2	0	0	0	0	0	116.38	2	17.8465	65	2	2	0	0	3	1	0.2	0	1	0	0
0	0	0	1	0	0	1	2	0	0	0	0	1	0	171.25	2	20	62	2	1	0	0	3	0	9	0	0	0	0
0	0	0	0	1	0	1	0	0	0	0	0	0	0	177.75	2	19.2234	69	2	1	0	0	2	1	6	0	1	0	0
0	0	0	0	0	0	0	0	0	0	0	0	0	0	164.88	2	19.1953	33	2	3	0	0	3	0	3	0	0	0	0
1	3	0	1	2	1	1	3	0	2	0	0	0	0	71.63	2	23.833	72	2	1	0	0	3	1	15	1	1	0	0
0	0	0	0	0	0	1	0	0	0	1	0	0	0	160.25	2	23.8751	63	2	2	0	0	3	1	20	1	0	0	0
0	1	0	0	0	0	0	0	0	0	0	0	0	0	141.79	1	25.6055	60	2	2	0	0	3	1	2	0	0	0	0
1	3	0	0	0	0	1	2	3	1	2	1	0	0	126.75	2	29.7265	57	2	1	0	0	1	1	6	0	1	0	0
0	0	0	0	0	1	1	0	1	0	1	1	0	0	158.13	2	21.0938	43	2	3	0	0	3	0	13	1	1	0	0
0	2	0	0	0	0	0	0	0	0	0	1	1	0	121.71	2	24.5089	68	2	2	0	0	3	0	9	0	1	0	0
0	1	0	1	0	0	0	0	0	1	0	0	0	1	157.63	2	20.0796	39	2	3	0	0	3	0	0	0	1	0	0
0	0	0	0	0	0	0	0	0	0	0	0	0	0	193.63	2	19.1327	49	2	3	0	0	3	0	3	0	1	0	0
0	1	0	0	0	1	1	1	0	0	0	0	0	0	158	2	27.8876	61	2	2	0	0	2	1	30	0	0	0	0
1	1	0	1	0	1	1	3	0	1	0	1	1	0	83.38	2	18.4911	67	2	2	0	0	3	1	22	1	1	0	0
1	1	1	2	0	0	0	0	1	0	1	1	1	0	149.38	2	21.3599	42	2	2	0	1	3	0	3	0	0	0	0
0	3	0	3	3	2	1	2	0	1	0	0	0	0	131.88	1	23.3747	61	2	2	0	0	2	0	3	0	0	0	0
0	0	0	0	0	0	0	2	0	0	0	0	0	0	151.63	1	20.7612	54	2	3	0	0	3	0	20	0	0	0	0
1	2	0	0	0	1	0	2	0	1	0	0	0	0	124.63	2	25.8876	75	2	1	0	0	3	1	2	0	1	0	0
0	0	0	0	0	0	1	1	0	0	0	1	0	0	166.38	1	19.8347	68	2	1	0	4	3	0	2	0	0	0	0
1	0	0	0	0	0	1	3	0	0	0	0	0	0	143	2	21.7778	88	2	1	0	0	3	0	1	0	0	0	0
1	1	0	1	1	1	0	0	1	0	0	1	1	0	102.88	2	23.815	60	2	2	0	0	3	0	40	0	1	0	0
0	1	1	2	1	1	2	2	1	1	3	1	1	1	170.13	2	23.3355	37	2	3	0	4	3	0	4	0	0	0	0
0	1	0	0	0	0	1	0	0	0	0	0	1	2	120.79	2	23.8751	52	3	2	0	4	3	0	10	1	1	0	0
0	0	0	0	1	0	0	1	0	0	1	1	1	0	136.96	2	15.0551	38	2	3	0	0	2	0	0	1	0	0	0
0	0	0	0	0	0	1	1	0	0	0	0	0	0	182.88	2	24.4352	56	2	3	0	0	3	0	20	0	0	0	0
1	3	0	2	0	1	1	2	0	2	0	1	1	1	127.88	2	25.7117	51	2	2	0	5	2	1	1	0	1	0	0
1	1	1	1	1	1	1	2	1	1	1	1	1	1	122.88	2	21.2585	29	1	2	0	0	3	0	0	0	0	0	0
0	0	0	0	0	0	1	1	0	0	0	0	0	1	164.13	2	23.1473	68	2	3	0	0	3	1	2	0	1	0	0
0	0	0	0	0	0	1	0	1	0	0	0	0	0	147.88	2	24.5578	62	2	2	0	0	3	0	5	0	0	0	0
1	1	1	0	1	1	1	0	1	0	1	1	1	0	167.88	2	24.0346	43	2	3	0	4	3	0	2	0	0	0	0
1	0	0	0	0	0	1	2	1	0	0	0	0	0	174.63	2	21.0962	59	2	2	0	0	3	0	1	0	0	0	0
0	2	0	0	0	0	1	3	0	0	0	0	0	0	121.13	2	14.1723	66	3	2	0	0	3	1	30	0	1	0	0
0	0	0	0	0	3	1	1	0	1	0	0	1	0	159.13	2	24.3418	65	2	1	0	0	3	1	10	0	0	0	0
0	0	0	0	0	0	1	1	0	0	0	0	0	1	134.88	1	24.6094	66	2	2	0	0	3	0	3	0	0	1	0
0	2	0	0	0	0	0	0	0	0	0	0	0	0	161.88	2	21.9261	57	2	1	0	0	2	1	20	0	0	0	0
0	2	0	2	1	1	1	1	0	1	0	0	1	0	119.88	2	37.6378	63	2	2	0	0	3	1	4	0	1	0	0
0	0	0	0	0	0	0	0	0	1	0	0	0	0	168.88	2	16.6525	52	2	2	0	5	1	0	2	0	0	0	0
0	1	0	0	0	0	0	2	0	0	0	0	0	0	123.38	2	23.1405	63	2	2	0	0	2	0	4	1	1	0	0
0	0	0	0	0	0	1	0	0	0	0	0	0	0	171.88	1	23.8281	68	2	1	0	0	2	1	30	0	1	1	1
0	0	0	1	0	1	0	0	0	1	0	0	0	0	139.13	2	28.8754	63	2	2	0	0	3	1	1	1	0	0	0
0	0	0	1	0	1	0	1	0	0	0	0	0	0	167.88	2	23.5237	64	2	1	0	0	3	0	1.5	0	0	0	0
0	0	0	0	0	0	0	1	0	0	1	0	0	1	148.38	1	24.6094	73	2	2	0	0	3	1	4	0	1	1	0
0	0	0	0	0	0	0	3	1	0	0	0	1	1	165.88	1	27.6817	50	2	3	0	4	3	1	0	1	0	0	1
0	0	0	0	0	0	0	2	0	0	0	0	0	1	173.13	2	21.3593	53	2	2	0	5	1	0	0	0	0	0	0
0	2	0	0	0	1	0	0	0	0	0	0	0	0	142.38	2	21.6441	49	2	1	0	1	1	1	6	0	1	0	0
0	0	0	0	0	0	1	0	0	0	0	0	0	1	138.38	2	22.5069	68	2	2	0	0	3	0	20	0	0	0	0
1	0	1	0	0	0	0	1	1	0	1	1	0	0	165.38	2	13.7567	62.5	1	3	0	4	3	0	9	0	0	0	0
0	0	0	0	0	0	0	1	0	0	0	1	0	0	132.13	2	28.9341	62	1	2	0	0	3	1	0	0	0	0	0
1	1	0	0	1	1	1	0	0	0	0	0	0	0	123.38	2	22.8928	59	2	1	0	1	2	0	12	1	0	0	0
